# Supplementary material for: Risk perception of blood transfusions – a comparison of patients and allied healthcare professionals
Source: Springer Nature journal article supplement (doi:10.1186/s12913-018-2928-x), 2018-02-17
Supplement: MOESM1 [file 15472792]

## **Additional file 1 (Questionnaire)**

1) Do you perceive blood transfusions as a health hazard?

Not at all 1 - 2 - 3 - 4 - 5 very much

2) Are you concerned that the following complications can occur after a blood transfusion?

*Allergic reaction*

No concern 1 - 2 - 3 - 4 - 5 very often concerned

*Fever*

No concern 1 - 2 - 3 - 4 - 5 very often concerned

*Shortness of breath*

No concern 1 - 2 - 3 - 4 - 5 very often concerned

*Infection with HIV/hepatitis c virus*

No concern 1 - 2 - 3 - 4 - 5 very often concerned

*Medical error (like ABO-incompatible blood transfusion)*

No concern 1 - 2 - 3 - 4 - 5 very often concerned

3) Please make an estimate guess how often the following complications associated with blood transfusions occur

*Allergic reaction*

No occurrence 1 - 2 - 3 - 4 - 5 occurs very frequently

*Fever*

No occurrence 1 - 2 - 3 - 4 - 5 occurs very frequently

*Shortness of breath*

No occurrence 1 - 2 - 3 - 4 - 5 occurs very frequently

*Infection with HIV/hepatitis c virus*

No occurrence 1 - 2 - 3 - 4 - 5 occurs very frequently

*Medical error (like ABO-incompatible blood transfusion)*

No occurrence 1 - 2 - 3 - 4 - 5 occurs very frequently

4) Source of knowledge/opinion about blood transfusions (Please mark)

- General Practitioner
- Family & Friends
- Print media & television
- Internet
- Others

5) Your age:                      sex:

6) Marital status?

- Married
- Unmarried
- Divorced
- Widowed

7) Residence?

- Urban (City)
- Suburban (Edge of town)
- Municipal
- Rural (Village)

8) Blood donor:                      Yes/No?

9) Categorical denial of transfusion:                      Yes/No?
